# Supplementary material for: An Alzheimer‐associated TREM2 variant occurs at the ADAM cleavage site and affects shedding and phagocytic function
Source: PubMed Central journal article supplement (PMC5623859; doi:10.15252/emmm.201707672), 2017-08-30

**B**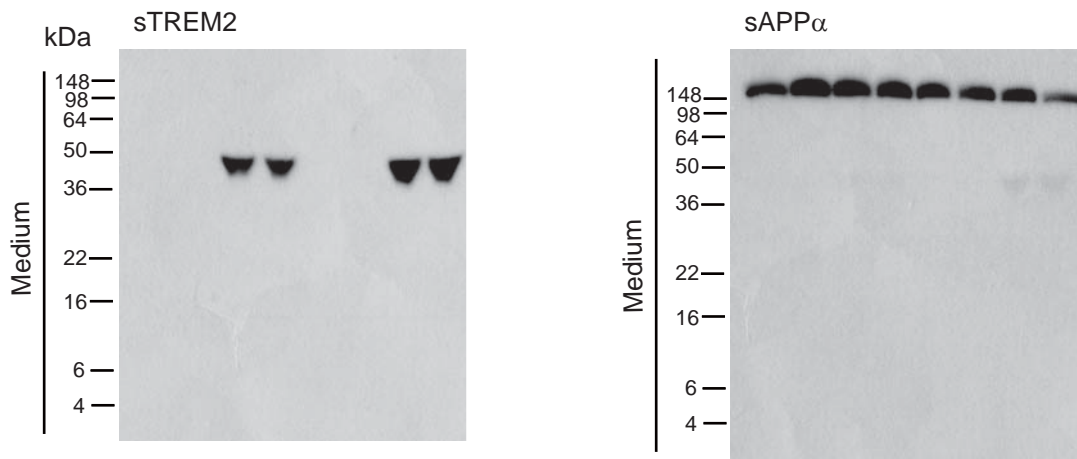**F**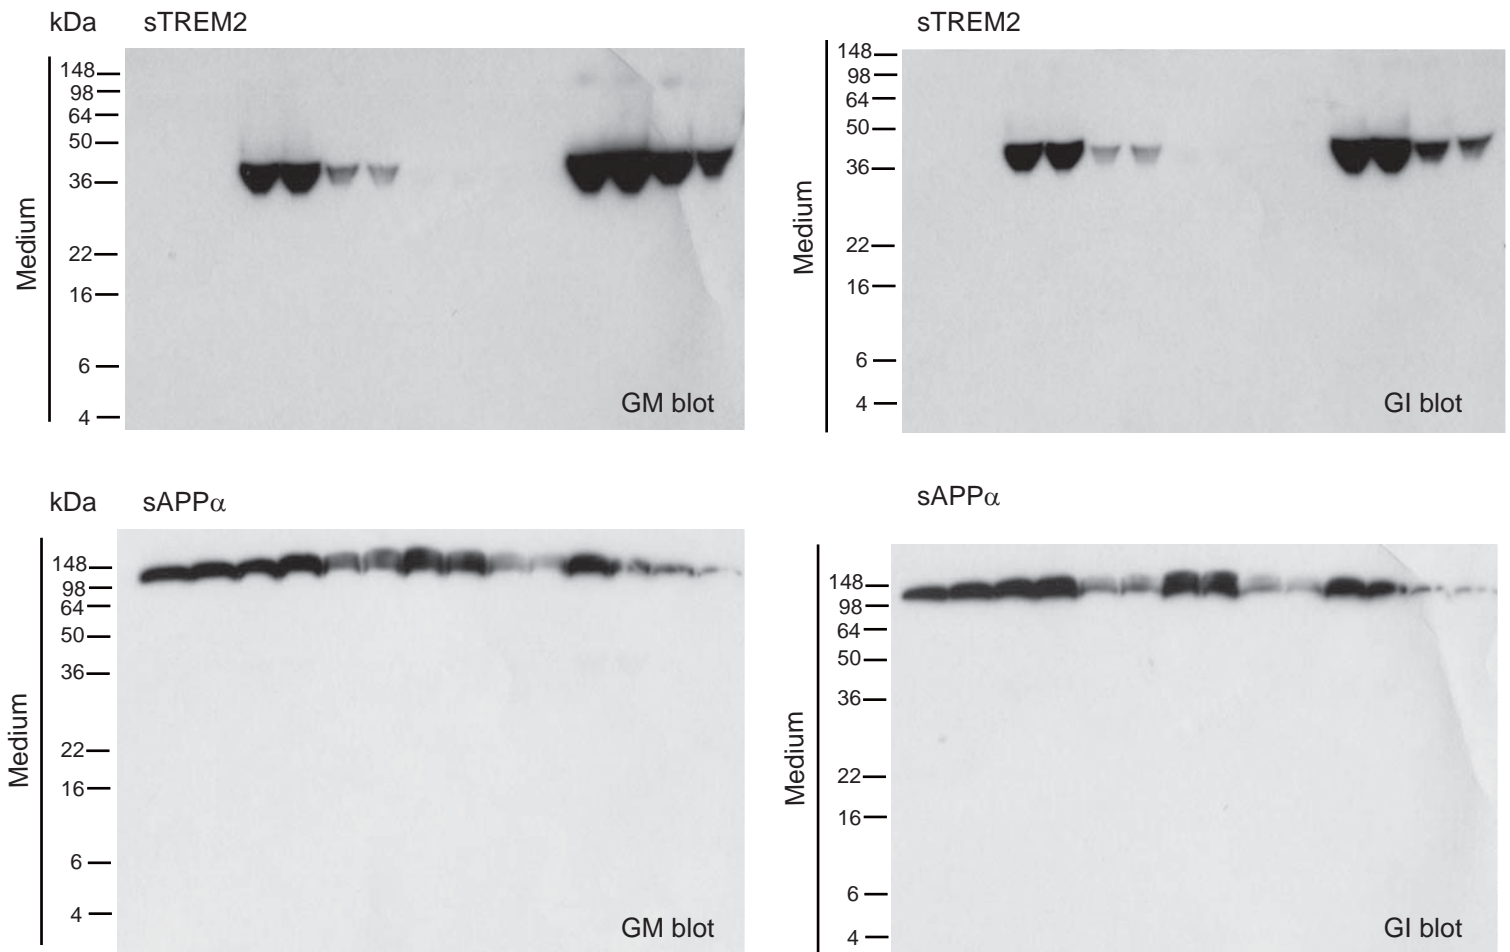**G**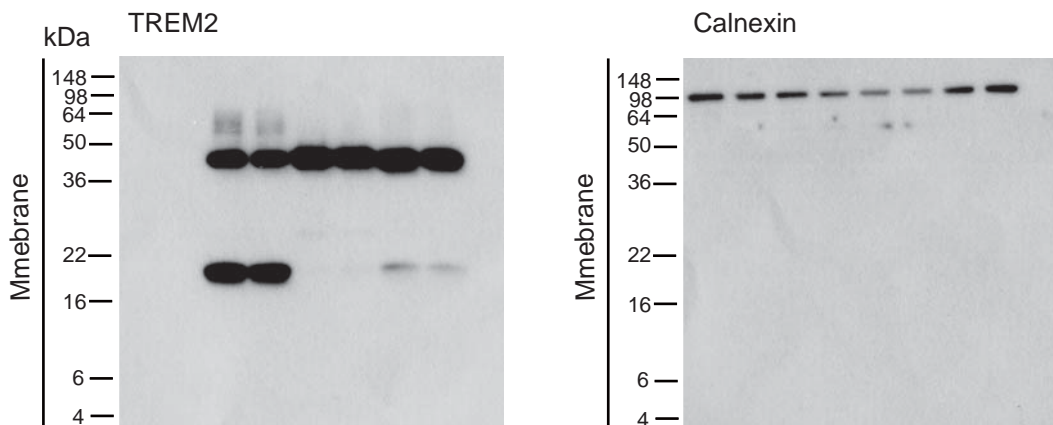

**H**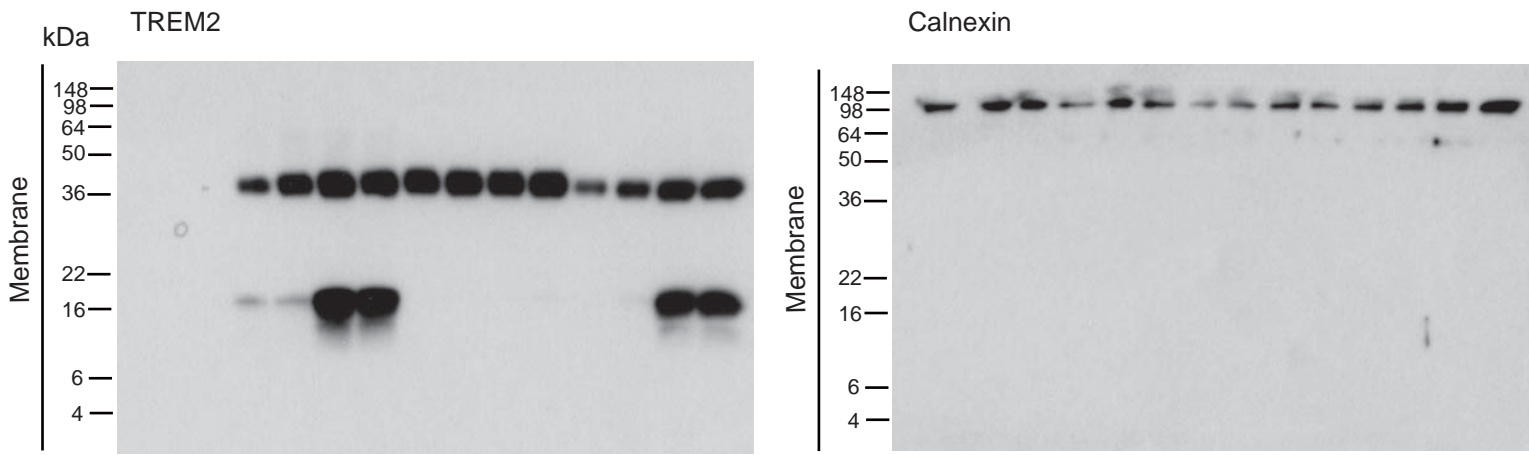**I**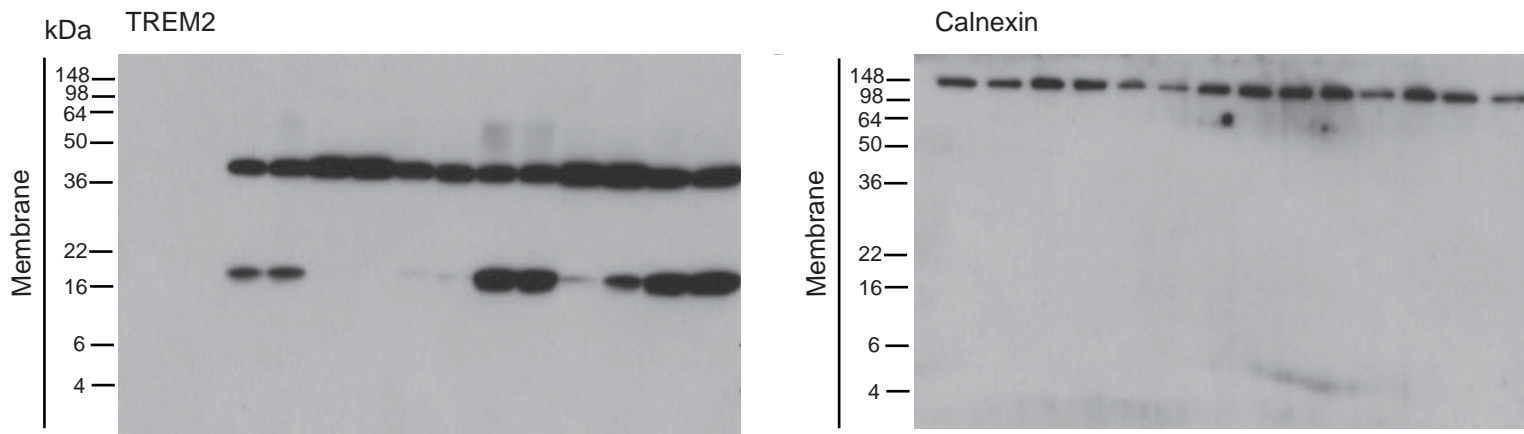**J**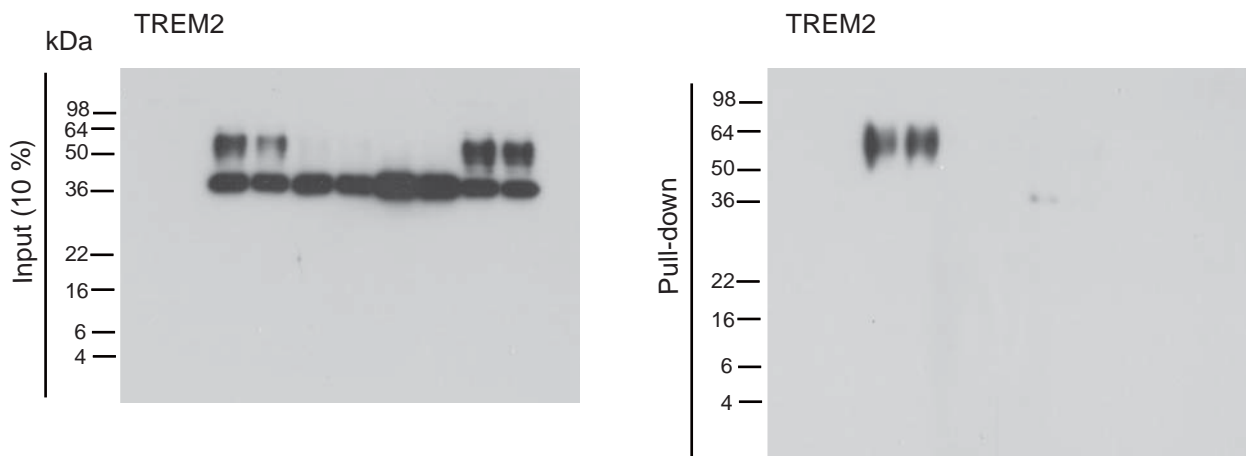

Supplement: EMMM-9-1356-s002.pdf [file EMMM-9-1356-s002.pdf]
